# Supplementary material for: Manipulating the interaction of Pt NPs with N-hollow carbon spheres by F-doping for boosting oxygen reduction/methanol oxidation reactions
Source: Royal Society of Chemistry journal article supplement (doi:10.1039/d2ta09416a), 2023-01-01
Supplement: d2ta09416a1.pdf [file d2ta09416a1.pdf]

## Supplementary materials

### Manipulating the Interaction of Pt NPs with N-hollow Carbon Spheres by F-doping for Boosting Oxygen Reduction/Methanol Oxidation Reactions

Chaojie Lyu,<sup>‡ab</sup> Jiarun Cheng,<sup>‡a</sup> Yuquan Yang,<sup>a</sup> Jiwen Wu,<sup>ab</sup> Kaili Wu,<sup>ab</sup> Yunguo Yang,<sup>a</sup> Woon-ming Lau,<sup>ab</sup> Ning Wang,<sup>\*a</sup> Dawei Pang<sup>\*c</sup> and Jinlong Zheng<sup>\*ab</sup>

<sup>a</sup> *Beijing Advanced Innovation Center for Materials Genome Engineering, Center for Green Innovation, School of Mathematics and Physics, University of Science and Technology Beijing, Beijing 100083, China*

<sup>b</sup> *Shunde Innovation School, University of Science and Technology Beijing, Foshan, Guangdong 528000, China*

<sup>c</sup> *Beijing Key Laboratory of Solid Microstructure and Properties, Department of Materials and Manufacturing, Beijing University of Technology, Beijing, 100124, China*

*\*Corresponding authors.*

*E-mail address: zhengjinlong@ustb.edu.cn (J. Zheng); wangning@ustb.edu.cn (N. Wang), gavinpang@emails.bjut.edu.cn (D. Pang)*

*‡The authors contributed equally to this work*

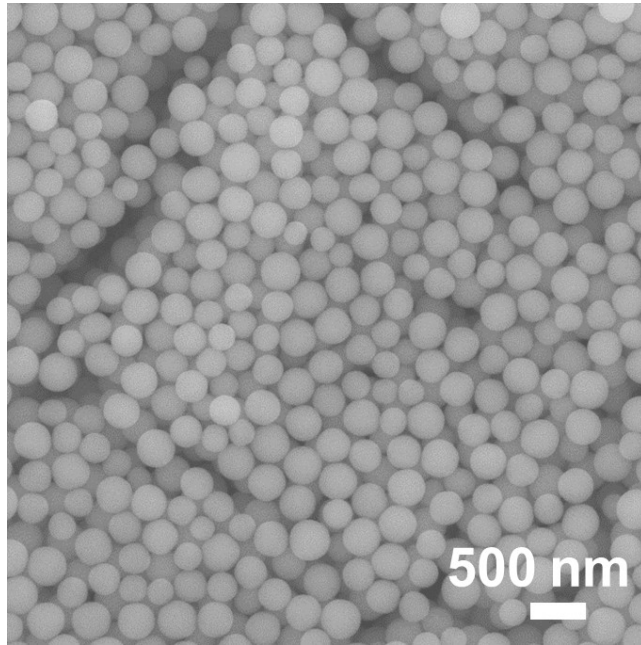

**Fig. S1** The SEM image of SiO<sub>2</sub> nanospheres.

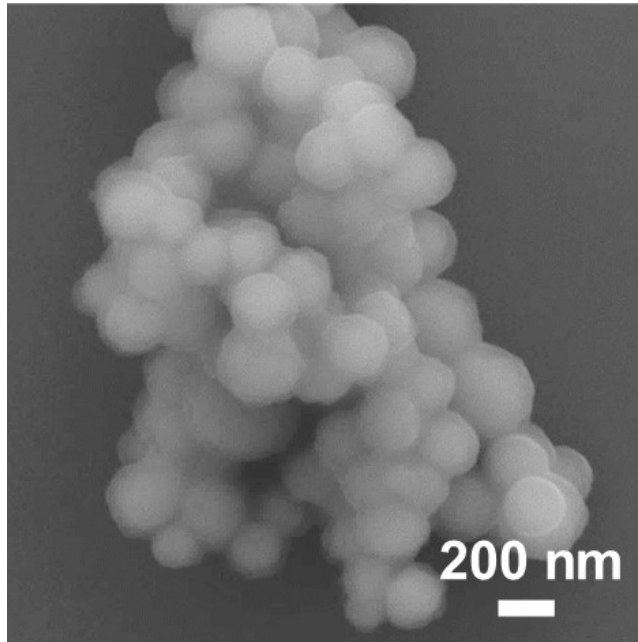

**Fig. S2** The SEM image of PDA@SiO<sub>2</sub> nanospheres with core-shell structure.

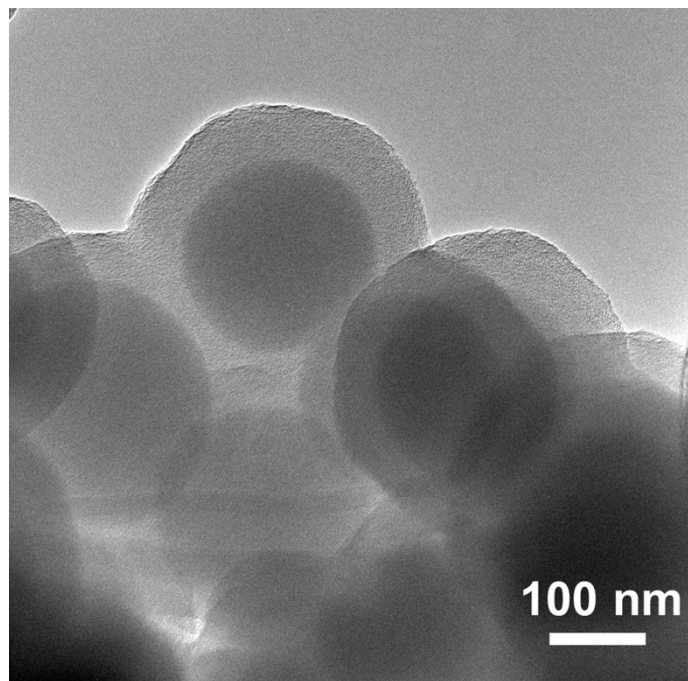

**Fig. S3** The TEM image of N-CS@SiO<sub>2</sub>.

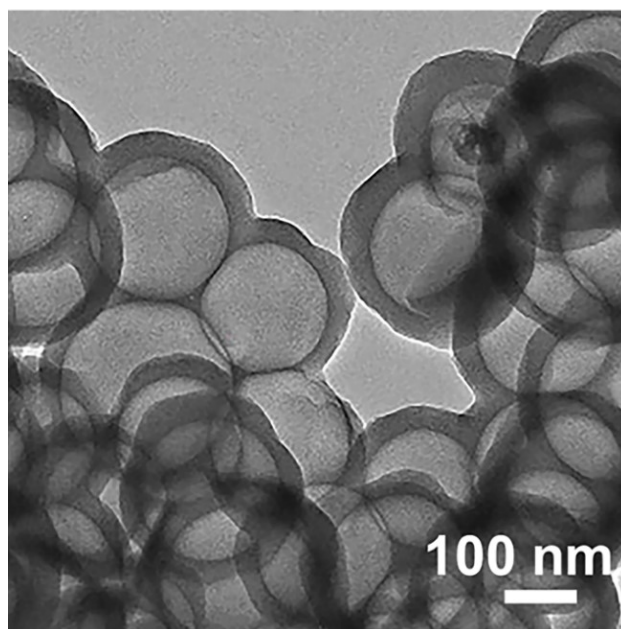

**Fig. S4** The TEM image of N-HCS.

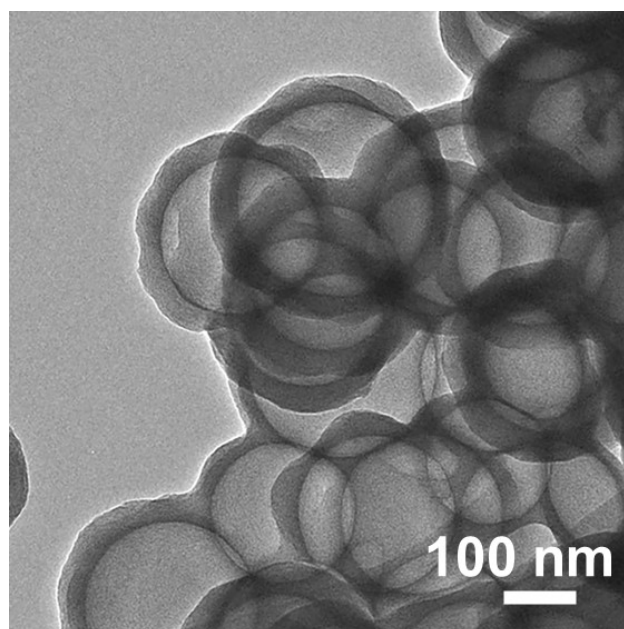

**Fig. S5** The TEM image of N, F-HCS.

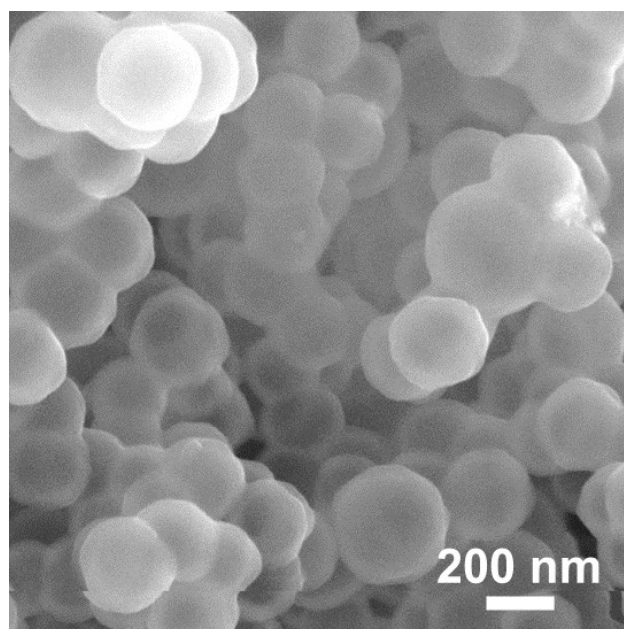

**Fig. S6** The SEM image of Pt@N-HCS.

**Table S1.** Pt mass low loading (wt%) from ICP-MS results of Pt@N, F-HCS and Pt@N-HCS.

| <b>Catalyst</b> | <b>Experimental Pt<br/>metal loading / wt%</b> |
|-----------------|------------------------------------------------|
| Pt@N, F-HCS     | 4.8                                            |
| Pt@N-HCS        | 4.9                                            |



**Table S2.** The proportion (%) of bonding types of deconvoluted C 1s peaks determined by XPS for Pt@N, F-HCS and Pt@N-HCS.

| Sample      | Proportion (%) of C 1s bonding types |             |         |         |         |
|-------------|--------------------------------------|-------------|---------|---------|---------|
|             | O-C=O                                | C-N/C-O/C-F | C-N/C-O | C-N/C=N | C=C/C-C |
| Pt@N-HCS    | 6.4                                  | NA          | 7.1     | 16.4    | 70.1    |
| Pt@N, F-HCS | 6.5                                  | 11.4        | NA      | 13.5    | 68.6    |

**Table S3.** The proportion (%) of bonding types of deconvoluted N 1s peaks determined by XPS for Pt@N, F-HCS and Pt@N-HCS.

| Sample      | Proportion (%) of N 1s bonding types |            |             |
|-------------|--------------------------------------|------------|-------------|
|             | Pyridinic-N                          | Pyrrolic-N | Graphitic-N |
| Pt@N-HCS    | 19.5                                 | 35.3       | 45.2        |
| Pt@N, F-HCS | 42.5                                 | 16.9       | 40.6        |

**Table S4.** The proportion (%) of bonding types of deconvoluted Pt 4f peaks determined by XPS for Pt@N, F-HCS and Pt@N-HCS.

| Sample      | Proportion (%) of N 1s bonding types |                 |
|-------------|--------------------------------------|-----------------|
|             | Pt <sup>x+</sup>                     | Pt <sup>0</sup> |
| Pt@N-HCS    | 20.8                                 | 79.2            |
| Pt@N, F-HCS | 30.3                                 | 69.7            |

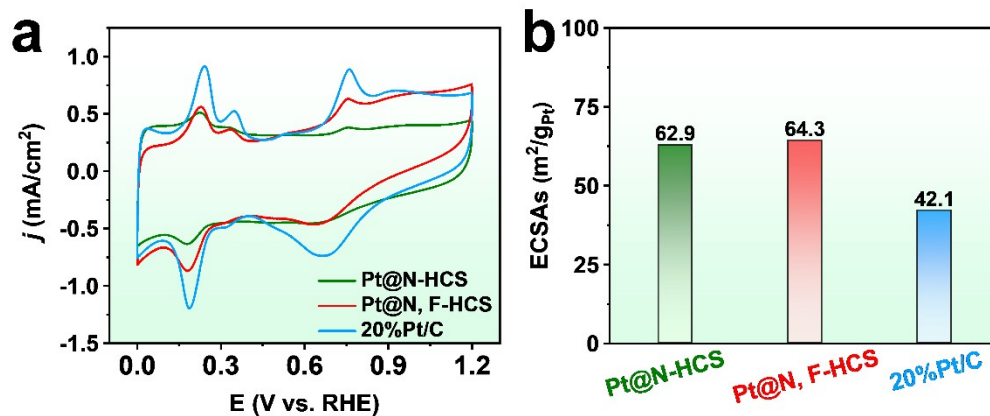

**Fig. S7** (a) CV curves of Pt@N, F-HCS, Pt@N-HCS and 20%Pt/C in Ar-saturated 0.1 M KOH solution with scan rate of 50 mV/s. (b) The corresponding ECSAs of Pt@N, F-HCS, Pt@N-HCS and 20%Pt/C catalysts.

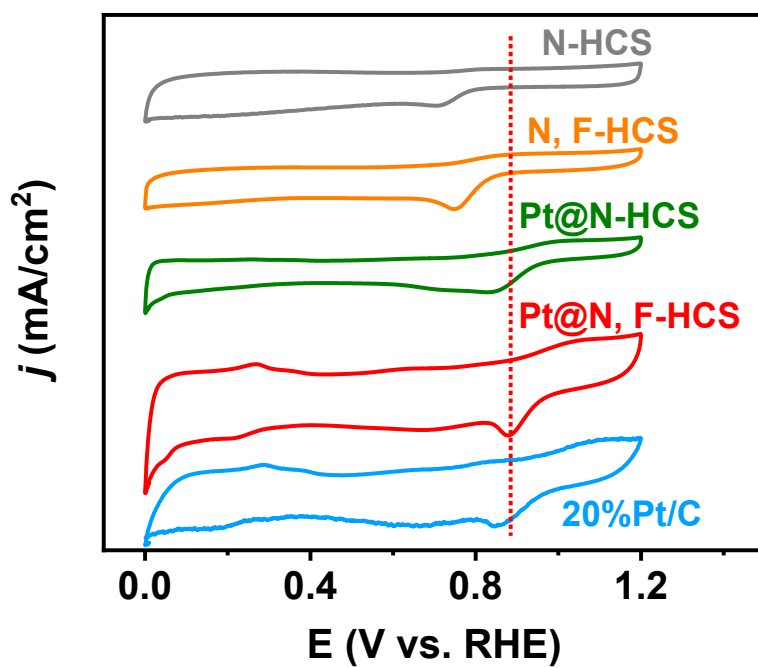

**Fig. S8** CV curves of Pt@N, F-HCS, Pt@N-HCS, N, F-HCS, N-HCS and 20%Pt/C under O<sub>2</sub> saturated condition in 0.1 M KOH solution with scan rate of 5 mV/s.

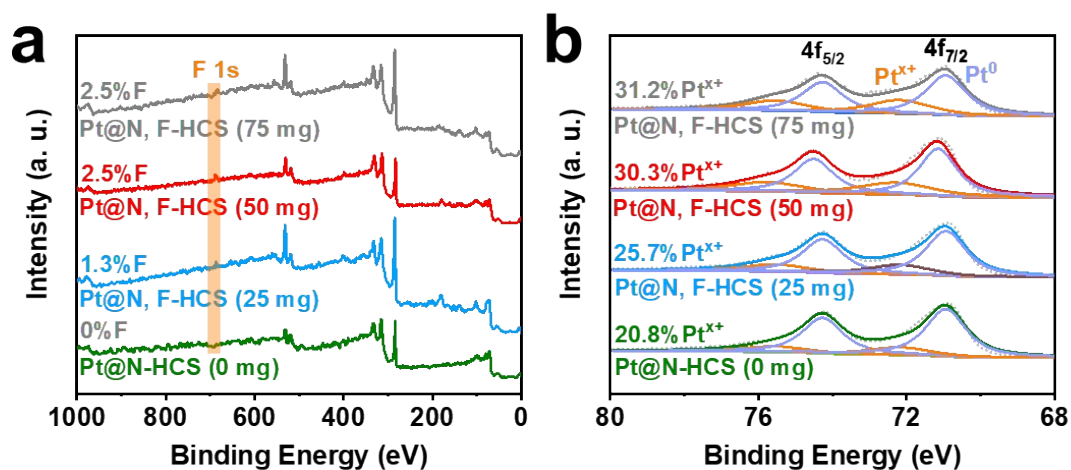

**Fig. S9** (a) XPS all spectrums of Pt@N, F-HCS samples with different F sources (0 mg, 25 mg, 50 mg and 75 mg). (b) Pt fine spectrums of Pt@N, F-HCS samples with different F sources (0 mg, 25 mg, 50 mg and 75 mg) and Pt<sup>x+</sup> contents (20.8%, 25.7%, 30.3% and 31.2%).

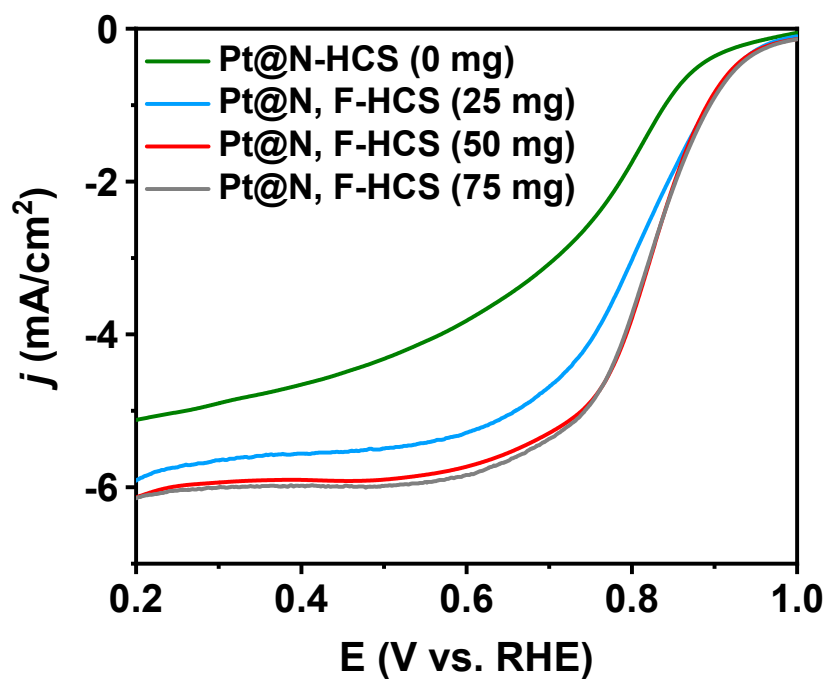

**Fig. S10** LSV curves of Pt@N, F-HCS catalysts with different F source amount (0 mg, 25 mg, 50 mg and 75 mg).

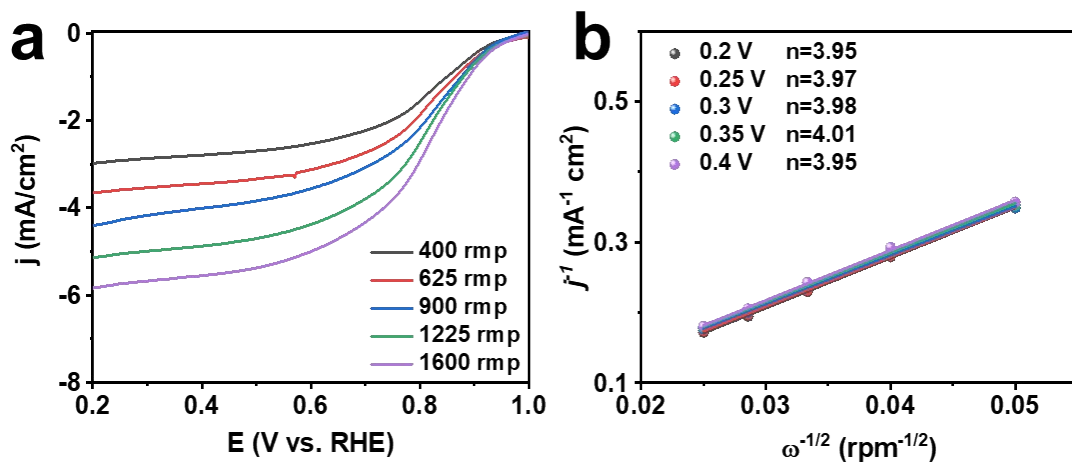

**Fig. S11** (a, b) RDE measurements of commercial 20%Pt/C in O<sub>2</sub>-saturated 0.1 M KOH solution at 400-1600 rpm.



**Table S5.** Comparison ORR performance of the Pt@N, F-HCS with recently reported Pt-based catalysts in alkaline solution.

| Catalysts                            | $E_{on}$<br>(V vs RHE) | $E_{1/2}$<br>(V vs RHE) | $j_L$<br>(mA/cm <sup>2</sup> ) | Tafel slope<br>(mV/dec) | Ref              |
|--------------------------------------|------------------------|-------------------------|--------------------------------|-------------------------|------------------|
| <b>Pt@N, F-HCS</b>                   | <b>0.98</b>            | <b>0.84</b>             | <b>6.21 (0.2 V)</b>            | <b>48.4</b>             | <b>This work</b> |
| Pt <sub>2</sub> Pd <sub>3</sub> /CKN | 0.90                   | 0.821                   | 6.11 (0.4 V)                   | 83                      | S1               |
| 3 nm Pt                              | 0.953                  | 0.870                   | 4.3 (0.4 V)                    | 68.2                    | S2               |
| PtP <sub>2</sub> @PNC                | 0.97                   | 0.82                    | NA                             | NA                      | S3               |
| 3 wt % Pt/N-C                        | NA                     | 0.90                    | 5.5                            | 70                      | S4               |
| Pt/MFO/NPC                           | 0.980                  | 0.835                   | 4.66 (0.4 V)                   | NA                      | S5               |
| FePt-NSC                             | 1.02                   | 0.89                    | 5.67 (0.4 V)                   | 63                      | S6               |
| J.M.-Pt/C NCs                        | 0.91                   | 0.844                   | NA                             | NA                      | S7               |
| Pt@20N-CQDs                          | 0.925                  | 0.834                   | 3.83 (0.5 V)                   | NA                      | S8               |
| Pt/NC                                | NA                     | 0.82                    | 4.35 (0.3 V)                   | 80                      | S9               |
| Pt/GC                                | 0.92                   | 0.828                   | 5.6 (0.2 V)                    | 66                      | S10              |

**Table S6.** Comparison ORR activity of the Pt@N, F-HCS with recently reported Pt-based catalysts in alkaline electrolyte.

| Catalysts                                         | MA<br>(A/mg <sub>Pt</sub> ) @0.9V | SA<br>(mA/cm <sub>pt</sub> <sup>2</sup> ) @0.9V | Reference        |
|---------------------------------------------------|-----------------------------------|-------------------------------------------------|------------------|
| <b>Pt@N, F-HCS</b>                                | <b>1.76</b>                       | <b>2.73</b>                                     | <b>This work</b> |
| 3 nm Pt                                           | 0.4894                            | NA                                              | S2               |
| PtP <sub>2</sub> @PNC                             | 0.1486                            | NA                                              | S3               |
| 3 wt % Pt/N-C                                     | 0.238                             | NA                                              | S4               |
| J.M.-Pt/C NCs                                     | 0.067                             | NA                                              | S7               |
| L-cysteine-decorated Pt/C                         | 0.23                              | 0.44                                            | S11              |
| PtNi <sub>7</sub>                                 | 0.210                             | NA                                              | S12              |
| np-AlCoFeMoCr/Pt                                  | 0.81                              | NA                                              | S13              |
| PtPd MNs                                          | 0.428                             | 1.168                                           | S14              |
| Pd/Au-Pt                                          | 0.604                             | 1.34                                            | S15              |
| Pd@PtPd RDs                                       | 0.17                              | 0.42                                            | S16              |
| PtPd NNs                                          | 0.42                              | 0.91                                            | S16              |
| Pt <sub>37</sub> Cu <sub>56</sub> Au <sub>7</sub> | 0.871                             | 1.85                                            | S17              |
| Pt@Pd/C                                           | 1.38                              | 1.84                                            | S18              |

**Table S7.** Comparison ORR activity of the Pt@N, F-HCS with recently reported similar-sized Pt NPs doped materials.

| Catalysts                 | $E_{on}$<br>(V vs RHE) | $E_{1/2}$<br>(V vs RHE) | MA<br>(A/mg <sub>Pt</sub> )<br>@0.9V | SA<br>(mA/cm <sub>Pt</sub> <sup>2</sup> )<br>@0.9V | Tafel slope<br>(mV/dec) | Ref              |
|---------------------------|------------------------|-------------------------|--------------------------------------|----------------------------------------------------|-------------------------|------------------|
| <b>Pt@N, F-HCS</b>        | <b>0.98</b>            | <b>0.84</b>             | <b>1.76</b>                          | <b>2.73</b>                                        | <b>48.4</b>             | <b>This work</b> |
| Pt-ECPA                   | NA                     | NA                      | 0.22                                 | 0.12                                               | 69.3                    | S19              |
| Pt/C@NC                   | NA                     | 0.84                    | 0.22                                 | 0.41                                               | NA                      | S20              |
| 10Pt/SGCN-550             | NA                     | 0.85                    | 0.22                                 | 0.71                                               | NA                      | S21              |
| Pt/TiO <sub>2</sub> /C(R) | NA                     | 0.873                   | 0.249                                | 0.653                                              | 71                      | S22              |
| Pt/AVC                    | NA                     | 0.81                    | 0.93                                 | 1.14                                               | 113                     | S23              |
| P <sub>NS</sub> -Pt/C     | NA                     | 0.925                   | 1.00                                 | 1.81                                               | NA                      | S24              |
| Pt <sub>0.1</sub> /N-C    | 0.94                   | 0.68                    | 0.24                                 | NA                                                 | NA                      | S25              |
| Pt/N-OHPC                 | 0.90                   | 0.76                    | 0.553                                | 0.93                                               | 79.5                    | S26              |
| Pt/NPC                    | 0.969                  | 0.823                   | NA                                   | NA                                                 | 80                      | S5               |
| CN/Pt-140                 | 0.827                  | NA                      | 0.11                                 | 0.203                                              | 81                      | S27              |
| Pt/CoNC-2D                | 0.89                   | 0.83                    | 1.66                                 | NA                                                 | 49.5                    | S28              |
| Pt/(B-C)600               | NA                     | 0.885                   | 0.30                                 | 0.35                                               | NA                      | S29              |
| GQD-Pt NTAs               | 1.02                   | 0.87                    | 1.14                                 | 2.24                                               | NA                      | S30              |
| Pt-TMIM-rGO               | 0.975                  | NA                      | 0.346                                | 0.61                                               | NA                      | S31              |

**Table S8.** Electrochemical data for the MOR catalyzed by the synthesized Pt@N, F-HCS and comparison samples in 0.1 M KOH + 1 M CH<sub>3</sub>OH.

| <b>Catalysts</b>   | <b>Onset<br/>potential (V)</b> | <b>Peak<br/>potential (V)</b> | <b><math>I_f</math><br/>(mA/cm<sup>2</sup>)</b> | <b><math>I_b</math><br/>(mA/cm<sup>2</sup>)</b> | <b><math>I_f/I_b</math></b> |
|--------------------|--------------------------------|-------------------------------|-------------------------------------------------|-------------------------------------------------|-----------------------------|
| Pt@N-HCS           | 0.34                           | 0.79                          | 50.24                                           | 9.68                                            | 5.19                        |
| <b>Pt@N, F-HCS</b> | <b>0.28</b>                    | <b>0.76</b>                   | <b>59.98</b>                                    | <b>10.50</b>                                    | <b>5.71</b>                 |
| commercial 20%Pt/C | 0.38                           | 0.85                          | 34.82                                           | 8.35                                            | 4.17                        |

**Table S9.** Comparison of MOR activity of the Pt@N, F-HCS with recently reported Pt-based catalysts in alkaline solution.

| Catalysts                           | Electrolyte                             | MA<br>(A/mg <sub>Pt</sub> ) | SA<br>(mA/cm <sub>Pt</sub> <sup>2</sup> ) | Reference        |
|-------------------------------------|-----------------------------------------|-----------------------------|-------------------------------------------|------------------|
| <b>Pt@N, F-HCS</b>                  | <b>0.1 M KOH + 1 M CH<sub>3</sub>OH</b> | <b>2.28</b>                 | <b>3.55</b>                               | <b>This work</b> |
| PtNi <sub>7</sub>                   | 0.1 M NaOH + 0.1 M CH <sub>3</sub> OH   | 0.250 ± 0.10                | NA                                        | S12              |
| Pt nanodendrites                    | 0.1 M KOH + 1 M CH <sub>3</sub> OH      | 0.91                        | 1.84                                      | S32              |
| Pt/NGDY                             | 1 M KOH + 1 M CH <sub>3</sub> OH        | 1.449                       | 0.154                                     | S33              |
| 10:5-Pt/Ni(OH) <sub>2</sub> /N-CNTs | 0.1 M NaOH + 1 M CH <sub>3</sub> OH     | 0.344                       | 1.13                                      | S34              |
| Pt/N-CNTs                           | 0.1 M NaOH + 1 M CH <sub>3</sub> OH     | 0.261                       | 1.32                                      | S34              |
| GrPt                                | 1 M NaOH + 1 M CH <sub>3</sub> OH       | 0.939                       | NA                                        | S35              |
| Pt-Ce(CO <sub>3</sub> )OH/rGO-2     | 1 M KOH + 1 M CH <sub>3</sub> OH        | 1.277                       | NA                                        | S36              |
| Pt/NiFe-LDH                         | 1 M KOH + 1 M CH <sub>3</sub> OH        | 0.5123                      | NA                                        | S37              |
| Pt/NiFe-LDH/RGO                     | 1 M KOH + 1 M CH <sub>3</sub> OH        | 0.9493                      | NA                                        | S37              |
| PdPtNi NPs                          | 1 M KOH + 1 M CH <sub>3</sub> OH        | 1.167                       | 2.18                                      | S38              |
| PtNi NPs                            | 1 M KOH + 1 M CH <sub>3</sub> OH        | 0.872                       | 2.02                                      | S38              |
| Au@Pt HUSs                          | 0.5 M NaOH + 1 M CH <sub>3</sub> OH     | 0.22                        | NA                                        | S39              |

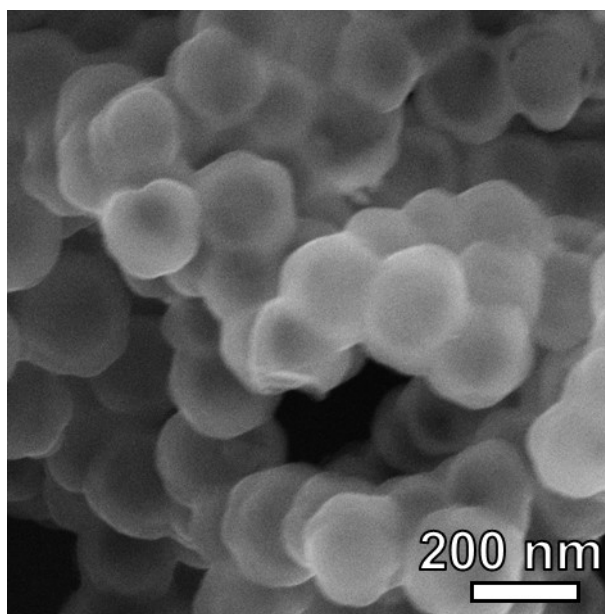

**Fig. S12** SEM image of Pt@N, F-HCS after MOR.

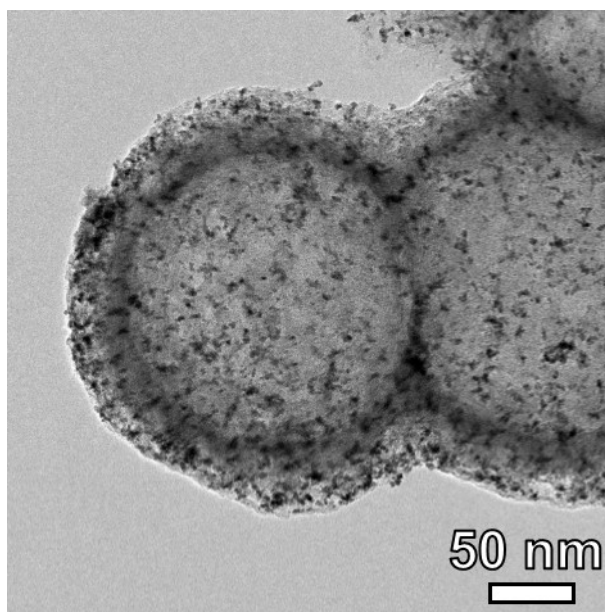

**Fig. S13** TEM image of Pt@N, F-HCS after MOR.

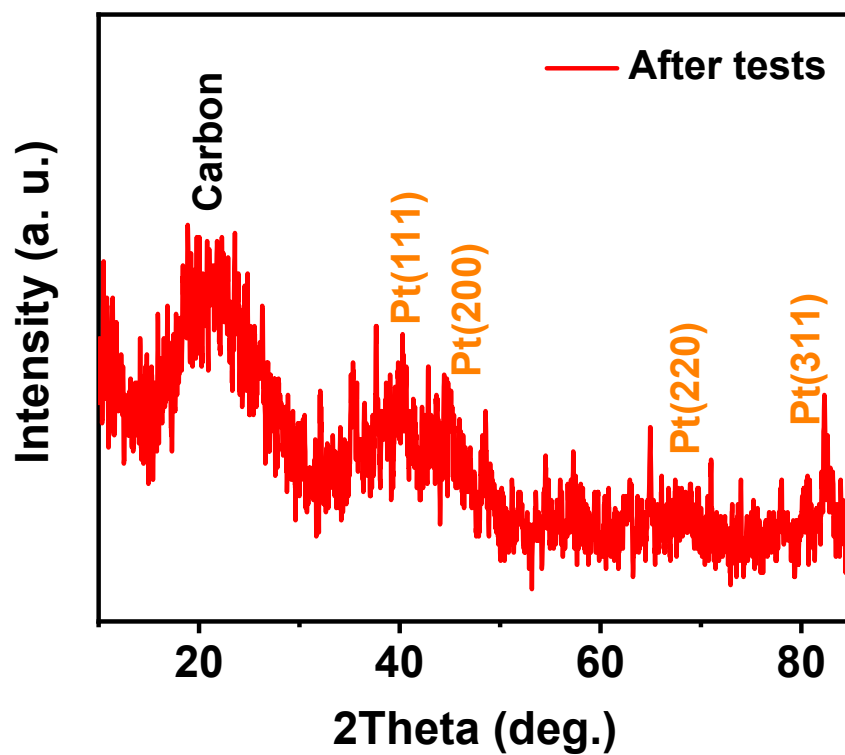

Fig. S14 XRD pattern of Pt@N, F-HCS after MOR.



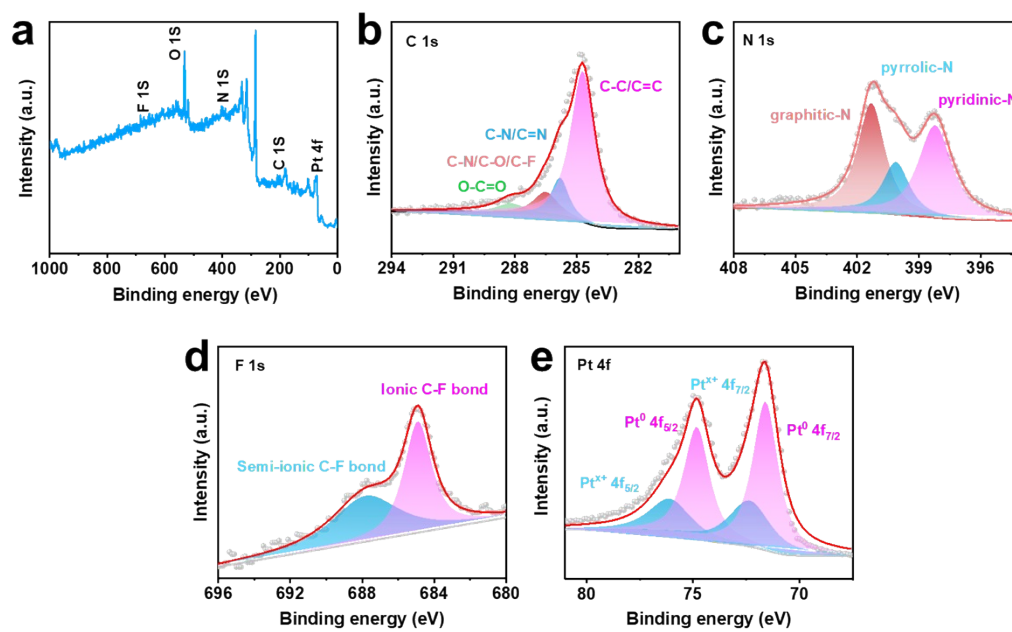

**Fig. S15** XPS patterns of Pt@N, F-HCS after MOR.

## References

1. D. Li, H. Fang, J. Yu, M. Xu, T. Li and J. Wang, Porous carbon supported PtPd alloy nanoparticles derived from N-heterocyclic carbene bimetal complex as efficient bifunctional electrocatalysts, *Electrochim. Acta*, 2020, **337**, 135855.
2. Z. H. Ma, H. Tian, G. Meng, L. X. Peng, Y. F. Chen, C. Chen, Z. W. Chang, X. Z. Cui, L. J. Wang, W. Jiang and J. L. Shi, *Sci. China-Mater.*, 2020, **63**, 2517-2529.
3. Z. Pu, R. Cheng, J. Zhao, Z. Hu, C. Li, W. Li, P. Wang, I. S. Amiin, Z. Wang, W. Min, D. Chen and S. Mu, *iScience*, 2020, **23**, 101793.
4. N. Batool, W. Iqbal, X.-F. Han, W.-T. Wang, H.-T. Teng, X. Hao, R. Yang and J.-H. Tian, *ACS Appl. Nano Mater.*, 2021, **4**, 12365-12372.
5. F. Niu, R. Gao, X. Wan, K. Su, H. Yue, H. Dong, Z. Cao, Y. Yin and S. Yang, *Int. J. Hydrog. Energy*, 2020, **45**, 33521-33531.
6. W. Liu, Q. Chen, F. Zhang, D. Xu and X. Li, Atomic metal, N, S co-doped 3D porous nano-carbons: Highly efficient catalysts for HT-PEMFC, *Int. J. Hydrog. Energy*, 2021, **46**, 13180-13189.
7. A. Beniwal, D. Bhalothia, W. Yeh, M. Cheng, C. Yan, P. C. Chen, K. W. Wang and T. Y. Chen, *Nanomaterials (Basel)*, 2022, **12**, 2824.
8. H.-G. Jo, K.-H. Kim and H.-J. Ahn, *Appl. Surf. Sci.*, 2021, **554**, 149594.
9. N. Batool, B. Shahzad, W. Iqbal, X.-F. Han, W.-T. Wang, J. Yan, R. Shi, J.-H. Tian and R. Yang, *ACS Appl. Energ. Mater.*, 2022, **5**, 13134-13141.
10. J. Golubović, L. Rakočević, D. Vasiljević Radović and S. Štrbac, *Catalysts*, 2022, **12**, 968.

11. N. Jung, H. Shin, M. Kim, I. Jang, H.-J. Kim, J. H. Jang, H. Kim and S. J. Yoo, *Nano Energy*, 2015, **17**, 152-159.
12. T. Tamaki, Y. Yamada, H. Kuroki and T. Yamaguchi, *J. Electrochem. Soc.*, 2017, **164**, F858-F860.
13. Z. Jin, J. Lyu, Y.-L. Zhao, H. Li, Z. Chen, X. Lin, G. Xie, X. Liu, J.-J. Kai and H.-J. Qiu, *Chem. Mat.*, 2021, **33**, 1771-1780.
14. H. Wang, H. Ren, S. Liu, K. Deng, H. Yu, X. Wang, Y. Xu, Z. Wang and L. Wang, *Nanotechnology*, 2022, **34**, 055401.
15. T. Chao, Y. Zhang, Y. Hu, X. Zheng, Y. Qu, Q. Xu and X. Hong, *Chemistry*, 2020, **26**, 4019-4024.
16. C. Li, Y. Ren, F. Gao, B. Li, L. Li, X. Zhang, Z. Lu, X. Yang and X. Yu, *ACS Appl. Energ. Mater.*, 2021, **4**, 10968-10975.
17. Y. Xie, Y. Yang, D. A. Muller, H. D. Abruña, N. Dimitrov and J. Fang, *ACS Catal.*, 2020, **10**, 9967-9976.
18. N. Bhuvanendran, S. Ravichandran, Q. Xu, S. Pasupathi and H. Su, *J. Electrochem. Energy Convers. Storage*, 2020, **17**, 031014.
19. S. B. Barim, G. Raptapoulos, S. Rommel, M. Aindow, P. Paraskevopoulou and C. Erkey, *Electrochim. Acta*, 2022, **434**, 141251
20. D. Liu, J. Zhang, D. Liu, T. Li, Y. Yan, X. Wei, Y. Yang, S. Yan and Z. Zou, *J Phys Chem Lett*, 2022, **13**, 2019-2026.
21. Y. Chen, X. Zheng, J. Cai, G. Zhao, B. Zhang, Z. Luo, G. Wang, H. Pan and W. Sun, *ACS Catal.*, 2022, **12**, 7406-7414.

22. W. Shi, A.-H. Park, Z. Li, S. Xu, J. M. Kim, P. J. Yoo and Y.-U. Kwon, *Electrochim. Acta*, 2021, **394**, 139127.
23. P. Varathan, S. Akula, P. Moni and A. K. Sahu, *Int. J. Hydrog. Energy*, 2020, **45**, 19267-19279.
24. B. A. Lu, L. F. Shen, J. Liu, Q. H. Zhang, L. Y. Wan, D. J. Morris, R. X. Wang, Z. Y. Zhou, G. Li, T. Sheng, L. Gu, P. Zhang, N. Tian and S. G. Sun, *ACS Catal.*, 2021, **11**, 355-363.
25. N. Tan, Y. Lei, D. Huo, M. Ding, G. Gao, Y. Zhang, S. Yu, R. Yu, H. Du and Tong Liu, *J. Mater. Sci.*, 2022, **57**, 538-552.
26. Y. Li, D. Wang, H. Xie and C. Zhang, *ChemistrySelect*, 2019, **4**, 12601-12607.
27. X. Shi, W. Wang, X. Miao, F. Tian, Z. Xu, N. Li and M. Jing, *ACS Appl Mater Interfaces*, 2020, **12**, 46095-46106.
28. T.-N. Tran, H.-Y. Lee, J.-D. Park, T.-H. Kang, B.-J. Lee and J.-S. Yu, *ACS Appl. Energy Mater.*, 2020, **3**, 6310-6322.
29. D. Liu, S. S. Gao, J. Z. Xu, X. J. Zhang, Z. M. Yang, T. Yang, B. Wang, S. C. Yang, C. Liang and C. C. Kong, *Appl. Surf. Sci.*, 2022, **604**, 154466.
30. L. Zhang, P. Lu, Y. Luo, J. Y. Zheng, W. Ma, L.-X. Ding and H. Wang, *J. Mater. Chem. A*, 2021, **9**, 9609-9615.
31. R. Badam, R. Vedarajan, K. Okaya, K. Matsutani and N. Matsumi, *J. Electrochem. Soc.*, 2021, **168**, 036515.
32. A. Cheng, Y. Wang, L. Ma, L. Lin and H. Zhou, *Nanotechnology*, 2020, **31**, 435403.
33. L. Hui, Y. Xue, C. Xing, Y. Liu, Y. Du, Y. Fang, H. Yu, B. Huang and Y. Li, *Adv Sci*

- (Weinh), 2022, **9**, 2104991.
34. Y. Wang, Y. Qin, X. Zhang, X. Dai, H. Zhuo, C. Luan, Y. Jiang, H. Zhao, H. Wang and X. Huang, *Dalton Trans*, 2018, **47**, 7975-7982.
35. C. Berghian-Grosan, T. Radu, A. R. Biris, M. Dan, C. Voica, F. Watanabe, A. S. Biris and A. Vulcu, *J. Energy Chem.*, 2020, **40**, 81-88.
36. G. Chen, Z. Dai, L. Sun, L. Zhang, S. Liu, H. Bao, J. Bi, S. Yang and F. Ma, *J. Mater. Chem. A*, 2019, **7**, 6562-6571.
37. Z. Wang, F. Zhang, H. Zou, Y. Yuan, H. Wang, J. Xia and Z. Wang, *J. Electroanal. Chem.*, 2018, **818**, 198-203.
38. G. Ren, Y. Liu, W. Wang, M. Wang, Z. Zhang, Y. Liang, S. Wu and J. Shen, *ACS Appl. Nano Mater.*, 2018, **1**, 3226-3235.
39. J. Bi, P. Gao, B. Wang, X. Yu, C. Kong, L. Xu, X. Zhang and S. Yang, *J. Mater. Chem. A*, 2020, **8**, 6638-6646.
